# Supplementary material for: Household Food Insecurity and the Association with Cumulative Biological Risk among Lower-Income Adults: Results from the National Health and Nutrition Examination Surveys 2007–2010
Source: MDPI journal article supplement (doi:10.3390/nu12051517), 2020-05-23
Supplement: s1 [file s1]

**Supplemental Table S1: Associations between household food security (using the four-category variable) and cumulative biological risk: National Health and Nutrition Examination Surveys 2007-2010**

|                        | Cumulative biological dysregulation score |             |                        |             | Elevated biological dysregulation (score $\geq 3$ ) |            |                        |            |  |
|------------------------|-------------------------------------------|-------------|------------------------|-------------|-----------------------------------------------------|------------|------------------------|------------|--|
|                        | Age- and gender-adjusted                  |             | Multivariable-adjusted |             | Age- and gender-adjusted                            |            | Multivariable-adjusted |            |  |
|                        |                                           | 95% CI      |                        | 95% CI      | OR                                                  | 95% CI     | OR                     | 95% CI     |  |
| All adults             |                                           |             |                        |             |                                                     |            |                        |            |  |
| Food secure            | Ref.                                      | -           | Ref.                   | -           | Ref.                                                | -          | Ref.                   | -          |  |
| Marginal food secure   | 0.18                                      | -0.02, 0.38 | 0.13                   | -0.05, 0.30 | 1.24                                                | 0.96, 1.59 | 1.22                   | 0.97, 1.55 |  |
| Low food security      | 0.25                                      | 0.11, 0.39  | 0.16                   | 0.04, 0.28  | 1.27                                                | 1.04, 1.55 | 1.20                   | 0.98, 1.46 |  |
| Very low food security | 0.16                                      | 0.01, 0.31  | 0.09                   | -0.06, 0.23 | 1.24                                                | 1.01, 1.53 | 1.20                   | 0.98, 1.49 |  |
| <i>P-trend</i>         |                                           | 0.0005      |                        | 0.008       |                                                     | 0.0006     |                        | 0.004      |  |
| Men                    |                                           |             |                        |             |                                                     |            |                        |            |  |
| Food secure            | Ref.                                      | -           | Ref.                   | -           | Ref.                                                | -          | Ref.                   | -          |  |
| Marginal food secure   | 0.13                                      | -0.21, 0.47 | 0.08                   | -0.25, 0.39 | 1.25                                                | 0.77, 2.02 | 1.16                   | 0.72, 1.88 |  |
| Low food security      | 0.07                                      | -0.16, 0.29 | 0.01                   | -0.20, 0.23 | 1.03                                                | 0.73, 1.46 | 0.98                   | 0.69, 1.38 |  |
| Very low food security | -0.06                                     | -0.29, 0.16 | -0.09                  | -0.30, 0.11 | 0.89                                                | 0.66, 1.20 | 0.86                   | 0.66, 1.13 |  |
| <i>P-trend</i>         |                                           | 0.9         |                        | 0.67        |                                                     | 0.85       |                        | 0.5        |  |
| Women                  |                                           |             |                        |             |                                                     |            |                        |            |  |
| Food secure            | Ref.                                      | -           | Ref.                   | -           | Ref.                                                | -          | Ref.                   | -          |  |
| Marginal food secure   | 0.23                                      | 0.04, 0.42  | 0.18                   | 0.01, 0.35  | 1.30                                                | 0.94, 1.80 | 1.31                   | 0.95, 1.79 |  |
| Low food security      | 0.43                                      | 0.23, 0.63  | 0.31                   | 0.11, 0.51  | 1.64                                                | 1.26, 2.15 | 1.53                   | 1.14, 2.05 |  |
| Very low food security | 0.37                                      | 0.11, 0.63  | 0.28                   | 0.03, 0.53  | 1.82                                                | 1.28, 2.59 | 1.74                   | 1.21, 2.49 |  |
| <i>P-trend</i>         |                                           | <0.0001     |                        | 0.001       |                                                     | <0.0001    |                        | <0.0001    |  |

Multivariable model further adjusted for race/ethnicity, educational attainment, household income, and marital status. P-interaction for multivariable-adjusted model of cumulative allostatic load by gender was 0.08, and for multivariable-adjusted model of elevated allostatic load by gender was 0.02.
